# Supplementary material for: Thrombopoietin knock-in augments platelet generation from human embryonic stem cells
Source: PubMed Central journal article supplement (PMC6050740; doi:10.1186/s13287-018-0926-x), 2018-07-17

# Additional Fig. S4

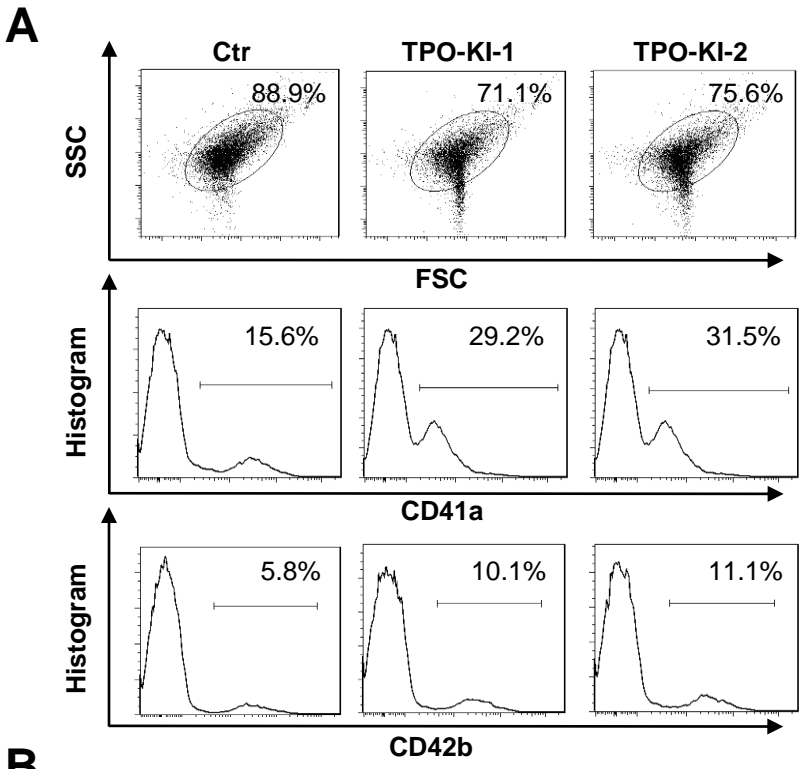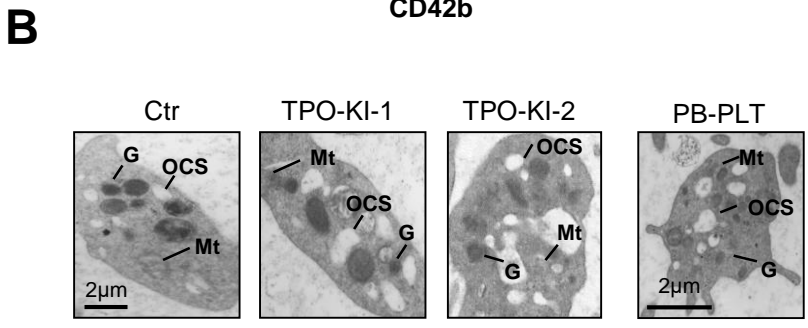

Supplement: 13287_2018_926_MOESM5_ESM.pdf [file 13287_2018_926_MOESM5_ESM.pdf]
